# Supplementary material
Source: PubMed Central journal article supplement (PMC8393294)

Figure 1 E

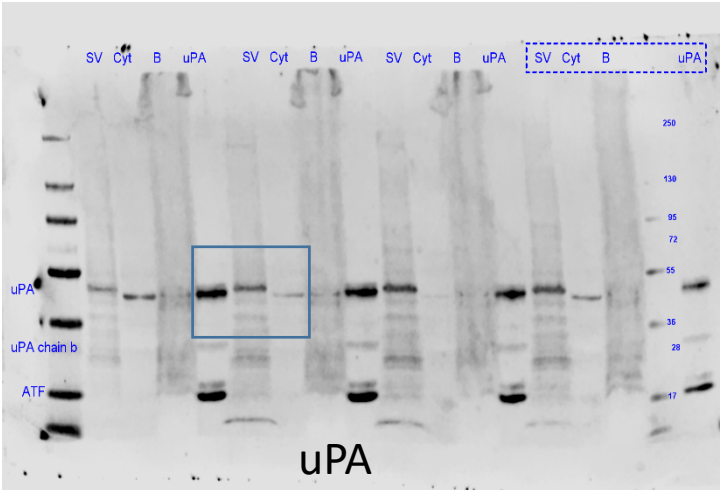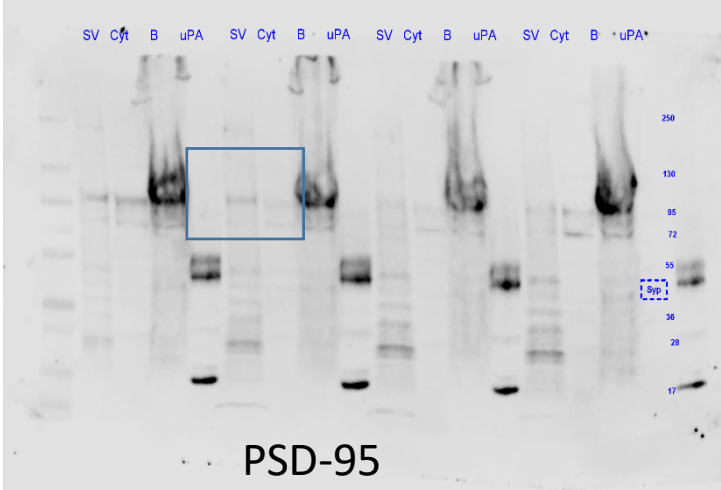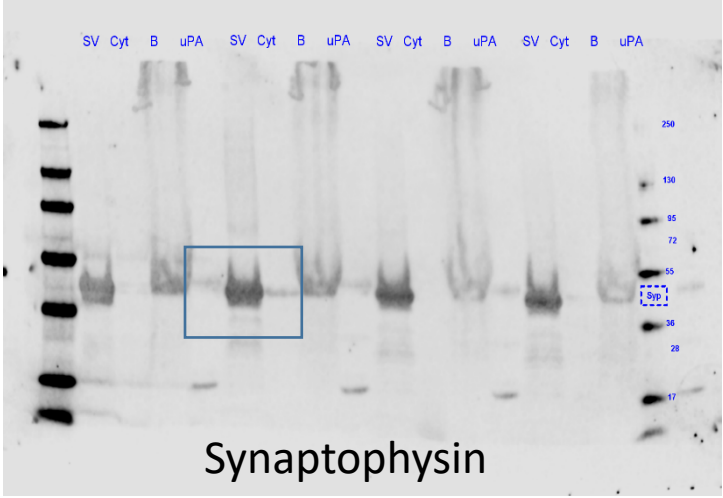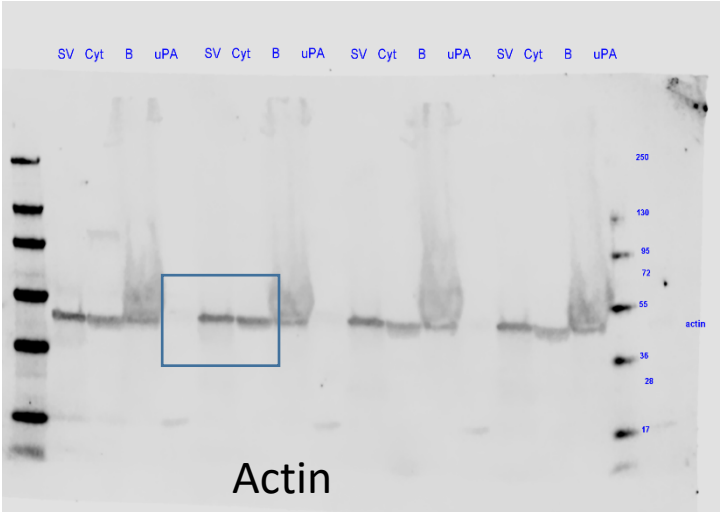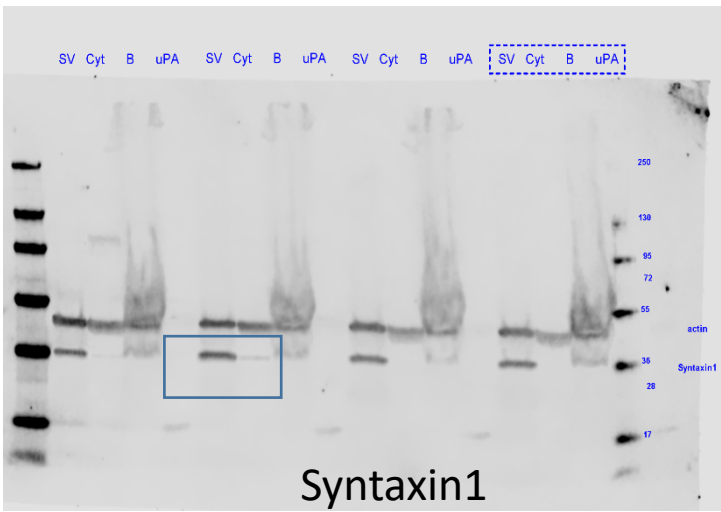

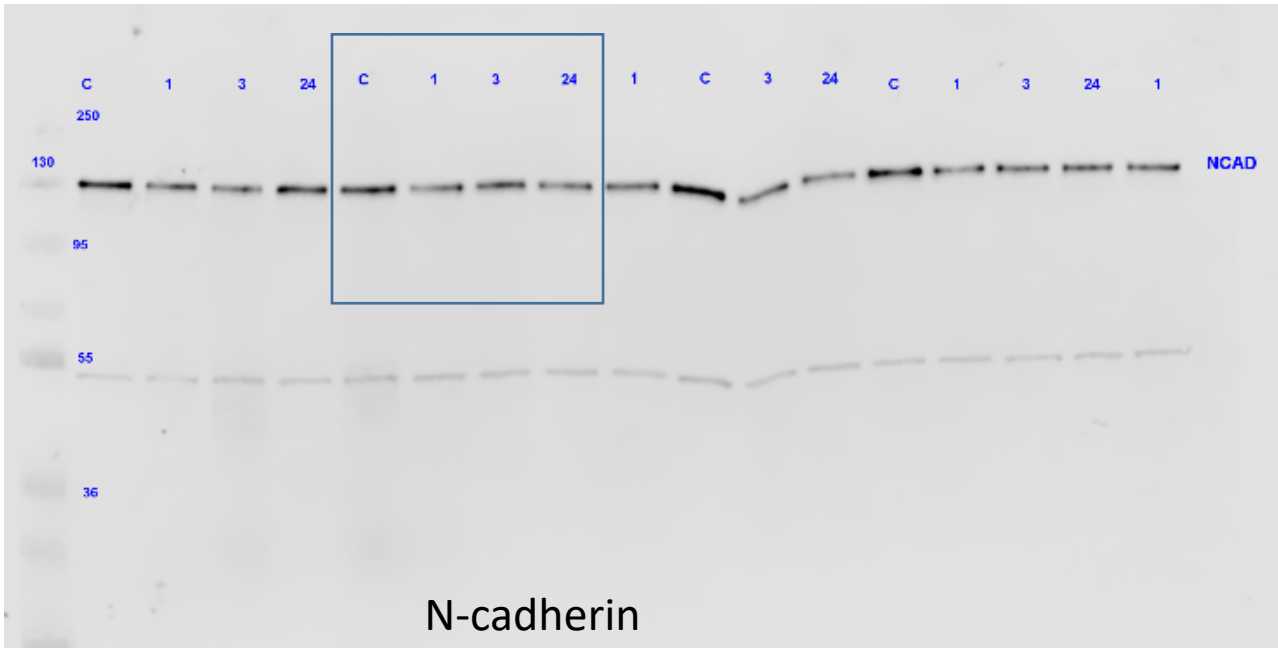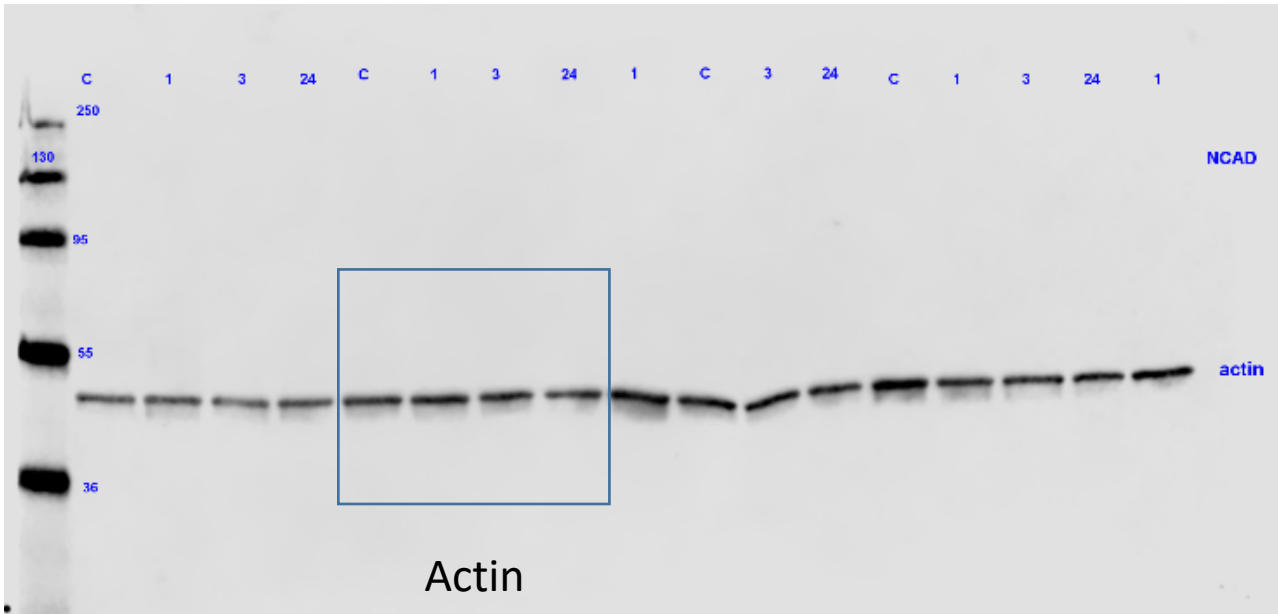

Figure 3 D

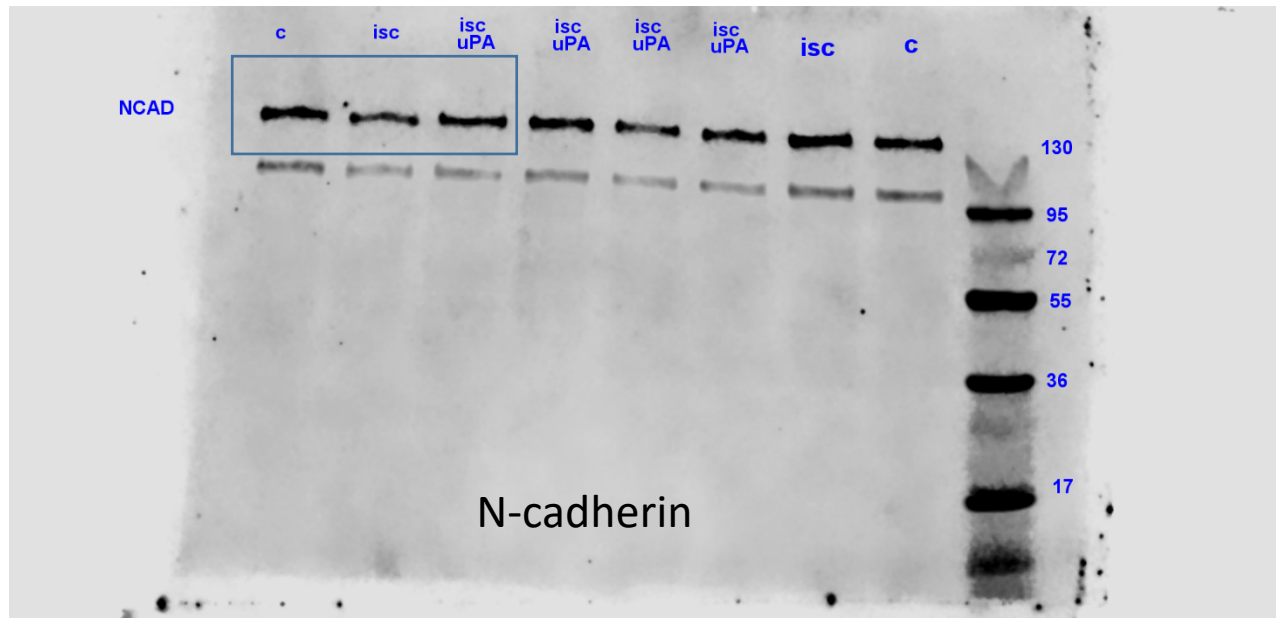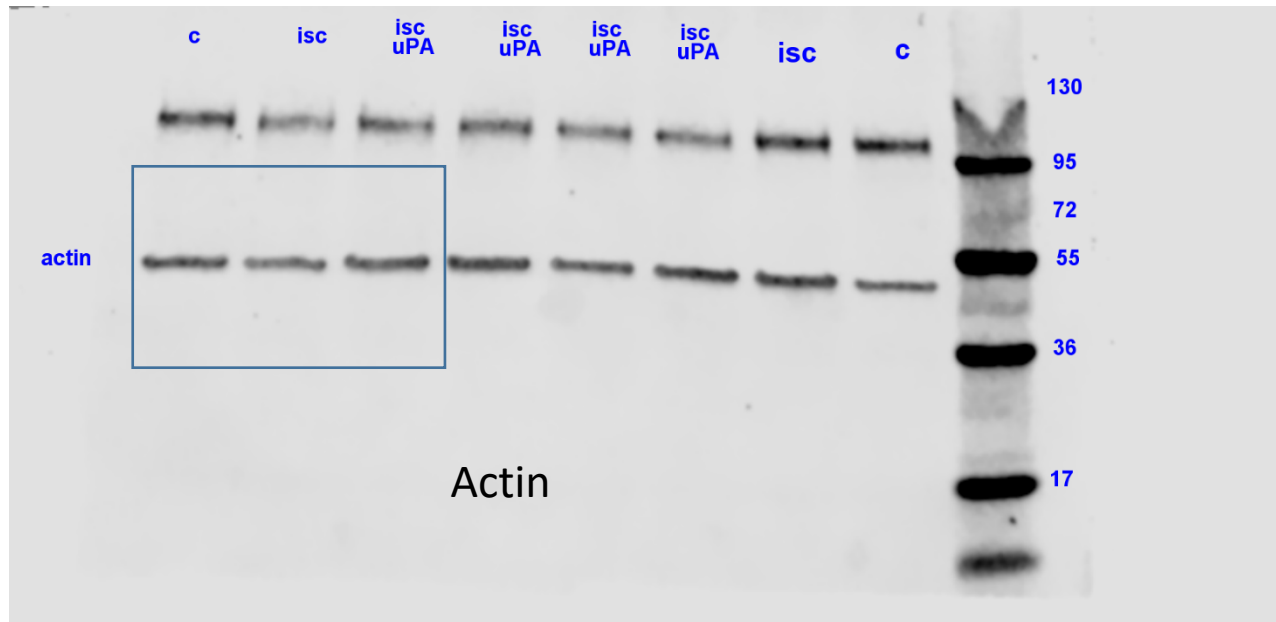

Figure 3 F

### N-cadherin

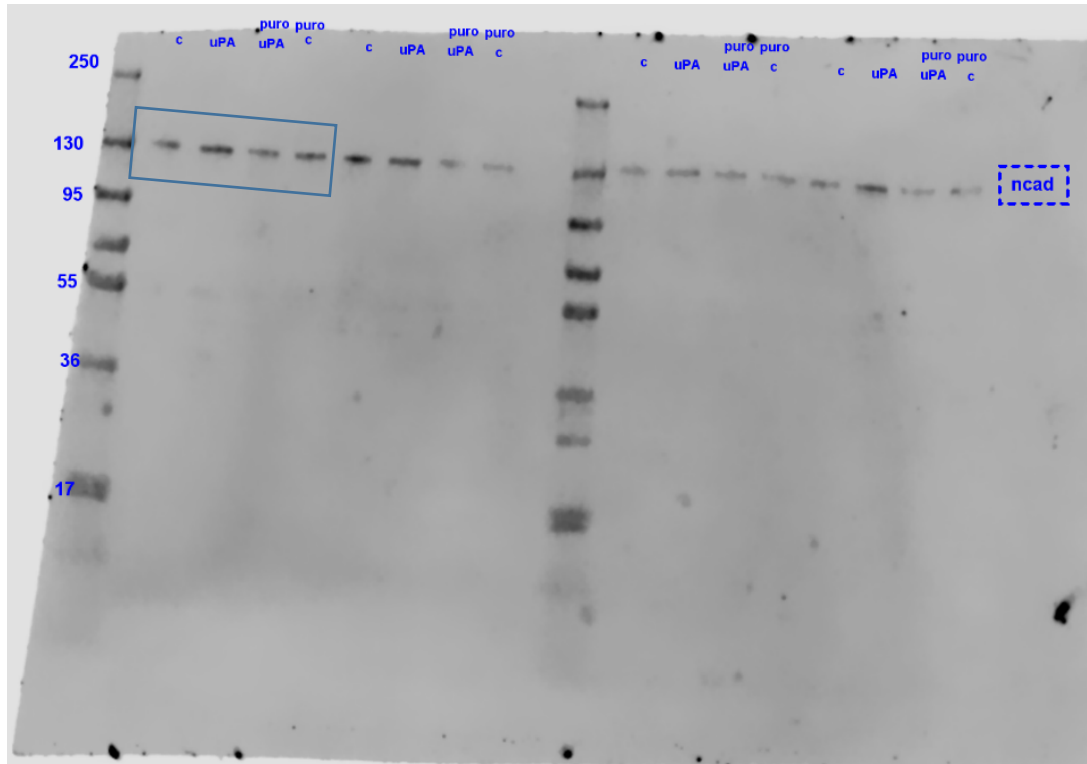

### Actin

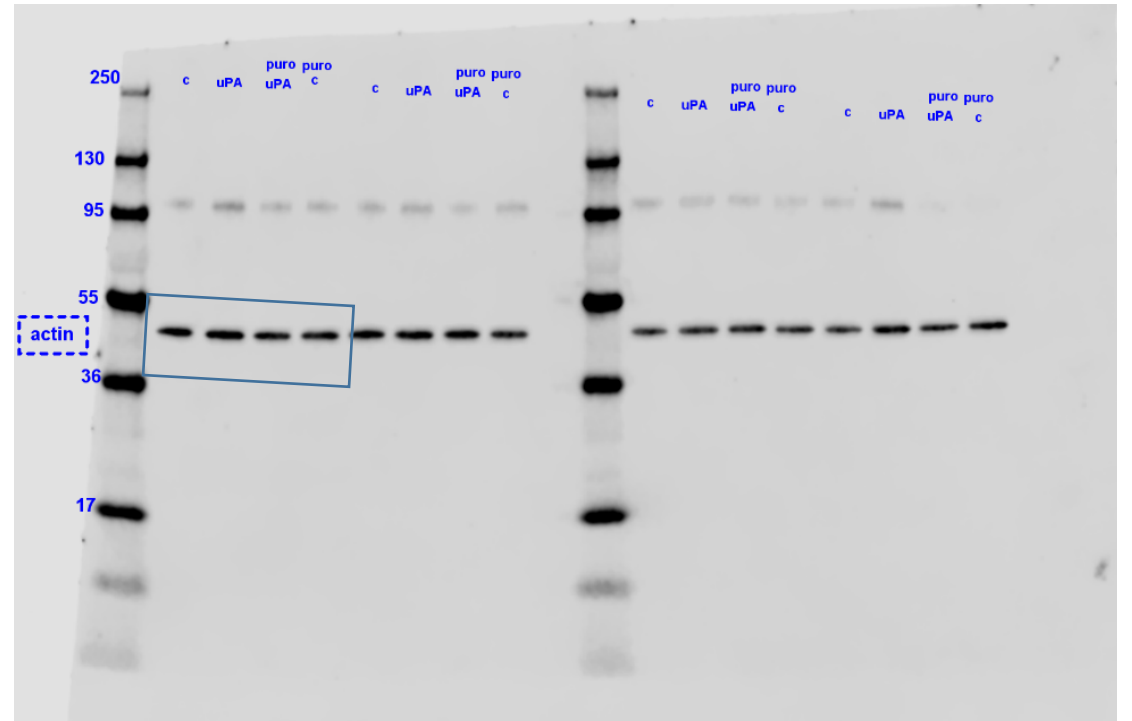

Figure 4 A

Supplement: sj-pdf-1-jcb-10.1177_0271678X211002297.pdf [file sj-pdf-1-jcb-10.1177_0271678X211002297.pdf]
